# Supplementary material for: Structure and properties of ionic fullerene complex Co+(dppe)2·(C60˙−)·(C6H4Cl2)2: distortion of the ordered fullerene cage of C60˙− radical anions
Source: Royal Society of Chemistry journal article supplement (doi:10.1039/c1dt10039d), 2011-01-01
Supplement: c1dt10039d.pdf [file c1dt10039d.pdf]

**Table S1.** IR spectra of the starting compounds and complex **1**.

| Components of the complex                       | Co(dppe)Br <sub>2</sub>                                                                                                                                                                                                                         | C <sub>60</sub>                | C <sub>6</sub> H <sub>4</sub> Cl <sub>2</sub> | <b>1</b>                                                                                                                                                                                                               |
|-------------------------------------------------|-------------------------------------------------------------------------------------------------------------------------------------------------------------------------------------------------------------------------------------------------|--------------------------------|-----------------------------------------------|------------------------------------------------------------------------------------------------------------------------------------------------------------------------------------------------------------------------|
| <b>Co<sup>+</sup>(dppe)</b>                     | 418w<br>476m<br>512m<br>530s<br>663w<br>691s sp<br>697s sp<br>719m<br>736m<br>852w<br>877w<br>998w<br>1026w<br>1090m sp<br>1100m sp<br>1159w<br>1181w<br>1275w<br>1308w<br>1334w<br>1433s<br>1483m<br>2852w<br>2924w<br>2956w<br>3050m<br>3073w |                                |                                               | 418w<br>480w<br>498w<br>533s*<br>668m<br>693s sp<br>696s sp<br>-<br>738s*<br>-<br>871w<br>998w<br>1032w*<br>1092s<br>1157w<br>1180w*<br>1275w<br>1305w<br>-<br>1432s<br>1481w<br>2856w<br>2918m<br>-<br>3050w<br>3072w |
| <b>C<sub>60</sub><sup>•-</sup></b>              |                                                                                                                                                                                                                                                 | 526s<br>576m<br>1182m<br>1429s |                                               | 533s*<br>576s<br>1180w*<br>1390s                                                                                                                                                                                       |
| <b>C<sub>6</sub>H<sub>4</sub>Cl<sub>2</sub></b> |                                                                                                                                                                                                                                                 |                                | 657w<br>748s<br>1030m<br>1122m<br>1453m       | 660w<br>738s*<br>1032w*<br>1123m<br>1453m                                                                                                                                                                              |

sp - splitted band

\* - the bands are coincided.

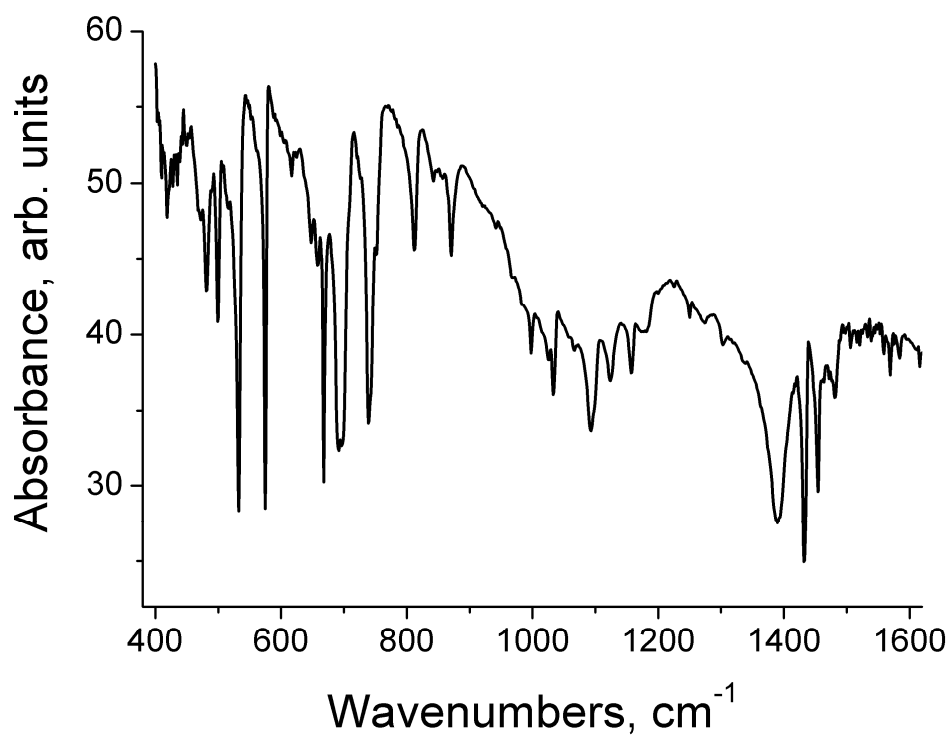

**Fig. 1S.** IR spectrum of **1** in KBr pellet.

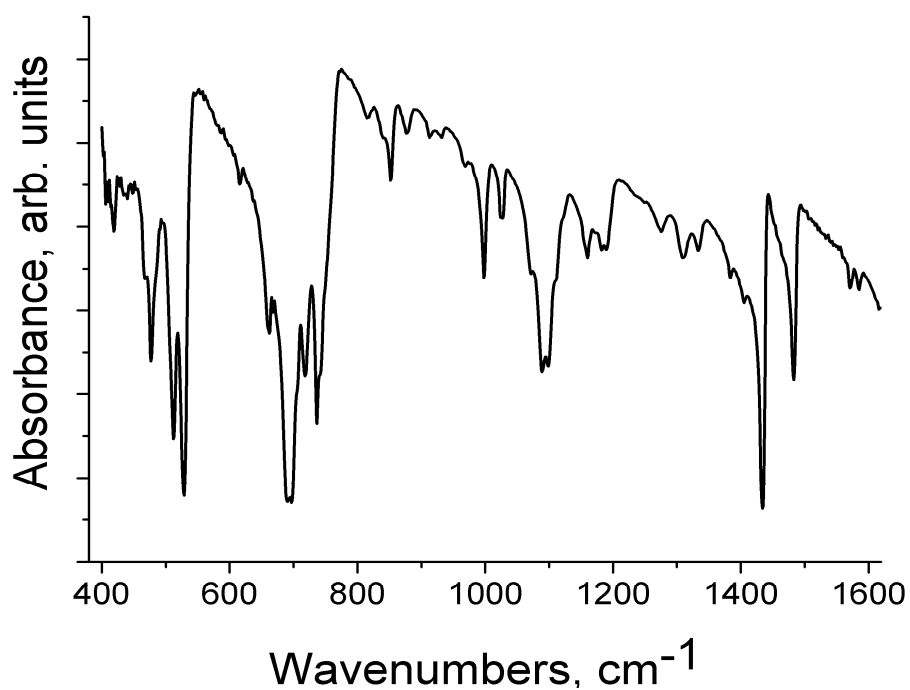

**Fig. 2S.** IR spectrum of Co(dppe)Br2 in KBr pellet.

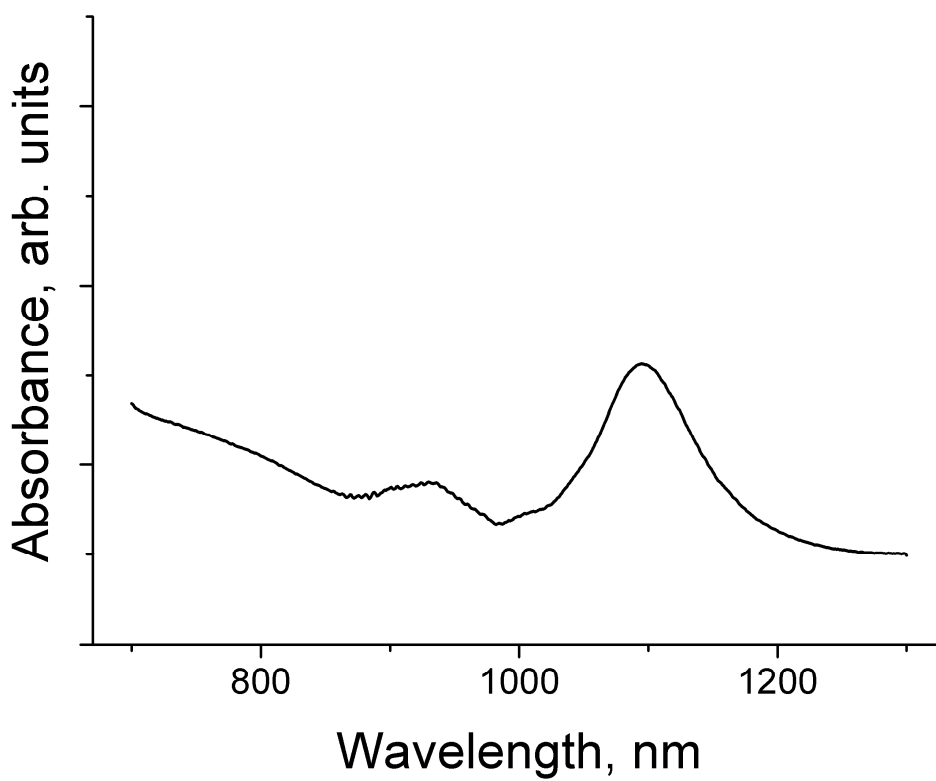

Fig. 3S. Spectrum of **1** in the NIR range in KBr pellet .

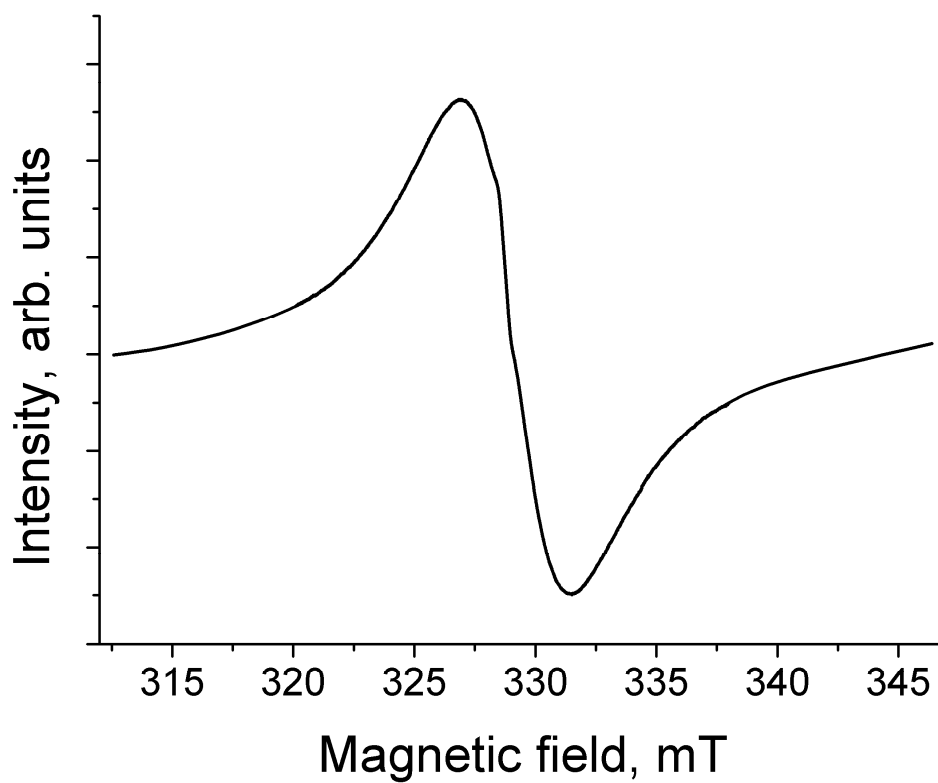

Fig. 4S. EPR spectrum of polycrystalline **1** at room temperature.
